# Supplementary material for: Preparation and evaluation of Brucella T4SS recombinant proteins in serodiagnosis of human brucellosis based on TMT-based proteomics technology
Source: Front Cell Infect Microbiol. 2025 Jan 16;14:1514046. doi: 10.3389/fcimb.2024.1514046 (PMC11779724; doi:10.3389/fcimb.2024.1514046)
Supplement: Supplementary File 2 — Information on highly expressed proteins of wild strains and vaccine strains. [file Table2.xlsx]

## Sheet: wild strain
Data S4. Highly expressed proteins in wild strain
Accession	Protein	Description	Score Sequest HT: Sequest HT	Coverage [%]	# Unique Peptides	# Peptides	# PSMs	# AAs	MW [kDa]	calc. pI	p_value	1_2
Q8G292	1-deoxy-D-xylulose-5-phosphate synthase	1-deoxy-D-xylulose-5-phosphate synthase OS=Brucella suis biovar 1 (strain 1330) OX=204722 GN=dxs PE=3 SV=1	58.32	10	5	5	7	643	69.1	6.58	3.67e-15	0.459
Q16CP0	1-deoxy-D-xylulose-5-phosphate synthase 2	1-deoxy-D-xylulose-5-phosphate synthase 2 OS=Roseobacter denitrificans (strain ATCC 33942 / OCh 114) OX=375451 GN=dxs2 PE=3 SV=1	3.1	1	1	1	1	642	68.1	6.15	1.28e-07	0.438
C0RJA4	2-dehydro-3-deoxyphosphooctonate aldolase	2-dehydro-3-deoxyphosphooctonate aldolase OS=Brucella melitensis biotype 2 (strain ATCC 23457) OX=546272 GN=kdsA PE=3 SV=1	249.67	38	6	6	45	277	29.5	6.55	2.5e-17	0.782
Q8YIJ3	2-isopropylmalate synthase	2-isopropylmalate synthase OS=Brucella melitensis biotype 1 (strain 16M / ATCC 23456 / NCTC 10094) OX=224914 GN=leuA PE=3 SV=2	210.64	18	7	7	64	555	61.6	5.25	1.82e-25	0.6115
Q8P3K4	2-keto-3-deoxy-L-fuconate dehydrogenase	2-keto-3-deoxy-L-fuconate dehydrogenase OS=Xanthomonas campestris pv. campestris (strain ATCC 33913 / DSM 3586 / NCPPB 528 / LMG 568 / P 25) OX=190485 GN=XCC4067 PE=1 SV=1	4.87	3	1	1	3	300	31.4	8.81	6.52e-16	0.501
Q8YJE4	2-oxoglutarate dehydrogenase E1 component	2-oxoglutarate dehydrogenase E1 component OS=Brucella melitensis biotype 1 (strain 16M / ATCC 23456 / NCTC 10094) OX=224914 GN=sucA PE=3 SV=1	335.8	14	14	14	71	1004	112.6	6.71	9.97e-47	0.697
Q1GVN4	30S ribosomal protein S13	30S ribosomal protein S13 OS=Sphingopyxis alaskensis (strain DSM 13593 / LMG 18877 / RB2256) OX=317655 GN=rpsM PE=3 SV=1	17.44	11	1	1	5	122	13.6	10.95	9.03e-05	0.579
A6WWW2	30S ribosomal protein S15	30S ribosomal protein S15 OS=Brucella anthropi (strain ATCC 49188 / DSM 6882 / CCUG 24695 / JCM 21032 / LMG 3331 / NBRC 15819 / NCTC 12168 / Alc 37) OX=439375 GN=rpsO PE=3 SV=1	42.2	19	1	1	4	89	10.2	10.32	5.61e-11	0.705
B0CH23	30S ribosomal protein S17	30S ribosomal protein S17 OS=Brucella suis (strain ATCC 23445 / NCTC 10510) OX=470137 GN=rpsQ PE=3 SV=1	2.51	13	1	1	4	80	9.1	9.94	0.00426119	0.817
A5VPX4	30S ribosomal protein S9	30S ribosomal protein S9 OS=Brucella ovis (strain ATCC 25840 / 63/290 / NCTC 10512) OX=444178 GN=rpsI PE=3 SV=1	63.03	21	1	2	16	158	17.2	10.37	1.69e-12	0.06
Q3SRI2	3-hydroxyacyl-[acyl-carrier-protein] dehydratase FabZ	3-hydroxyacyl-[acyl-carrier-protein] dehydratase FabZ OS=Nitrobacter winogradskyi (strain ATCC 25391 / DSM 10237 / CIP 104748 / NCIMB 11846 / Nb-255) OX=323098 GN=fabZ PE=3 SV=1	4.15	5	1	1	4	151	17	8.19	2.25e-11	0.591
Q8YJC9	3-isopropylmalate dehydratase large subunit	3-isopropylmalate dehydratase large subunit OS=Brucella melitensis biotype 1 (strain 16M / ATCC 23456 / NCTC 10094) OX=224914 GN=leuC PE=3 SV=1	15.83	3	1	1	1	469	50.7	6.16	1.24e-06	0.344
A9MCG4	3-isopropylmalate dehydratase small subunit	3-isopropylmalate dehydratase small subunit OS=Brucella canis (strain ATCC 23365 / NCTC 10854) OX=483179 GN=leuD PE=3 SV=1	22.34	8	1	1	5	201	22.2	5.21	4.15e-10	0.684
C0RIB3	3-oxoacyl-[acyl-carrier-protein] synthase 3	3-oxoacyl-[acyl-carrier-protein] synthase 3 OS=Brucella melitensis biotype 2 (strain ATCC 23457) OX=546272 GN=fabH PE=3 SV=1	65.96	21	4	4	12	323	34.4	6.19	0.00327527	0.743
Q8YB10	3-oxo-tetronate kinase	3-oxo-tetronate kinase OS=Brucella melitensis biotype 1 (strain 16M / ATCC 23456 / NCTC 10094) OX=224914 GN=otnK PE=1 SV=1	20.33	6	2	2	5	436	45.9	5.39	5e-07	0.663
A7GXB4	3-phosphoshikimate 1-carboxyvinyltransferase	3-phosphoshikimate 1-carboxyvinyltransferase OS=Campylobacter curvus (strain 525.92) OX=360105 GN=aroA PE=3 SV=1	0	2	1	1	2	424	45.9	7.05	1.5e-19	0.302
B2S9W9	4-hydroxy-3-methylbut-2-enyl diphosphate reductase	4-hydroxy-3-methylbut-2-enyl diphosphate reductase OS=Brucella abortus (strain S19) OX=430066 GN=ispH PE=3 SV=1	27.83	7	2	2	3	346	37.7	5.77	2.73e-09	0.672
Q2YJN7	4-hydroxy-tetrahydrodipicolinate reductase	4-hydroxy-tetrahydrodipicolinate reductase OS=Brucella abortus (strain 2308) OX=359391 GN=dapB PE=3 SV=1	243.78	41	7	7	37	268	27.6	6.87	4.9e-21	0.798
A5VSI8	50S ribosomal protein L27	50S ribosomal protein L27 OS=Brucella ovis (strain ATCC 25840 / 63/290 / NCTC 10512) OX=444178 GN=rpmA PE=3 SV=1	7.62	30	2	2	2	89	9.4	10.74	0.000116227	0.833
Q8G276	50S ribosomal protein L9	50S ribosomal protein L9 OS=Brucella suis biovar 1 (strain 1330) OX=204722 GN=rplI PE=3 SV=1	112.56	25	4	4	50	189	21	4.86	0.0365811	0.789
B0CLL1	5'-nucleotidase SurE	5'-nucleotidase SurE OS=Brucella suis (strain ATCC 23445 / NCTC 10510) OX=470137 GN=surE PE=3 SV=1	106.03	29	5	5	16	255	27.4	5.77	3.01e-05	0.833
Q8YGH2	6,7-dimethyl-8-ribityllumazine synthase 1	6,7-dimethyl-8-ribityllumazine synthase 1 OS=Brucella melitensis biotype 1 (strain 16M / ATCC 23456 / NCTC 10094) OX=224914 GN=ribH1 PE=1 SV=1	57.88	24	3	3	11	157	16.8	4.59	2.22e-13	0.646
P27868	Acetolactate synthase (Fragment)	Acetolactate synthase (Fragment) OS=Arthrospira platensis OX=118562 GN=ilvY PE=3 SV=1	9.35	2	1	1	2	579	63.4	6.64	7.06e-09	0.743
A9WWT6	Acetyl-coenzyme A synthetase	Acetyl-coenzyme A synthetase OS=Brucella suis (strain ATCC 23445 / NCTC 10510) OX=470137 GN=acsA PE=3 SV=1	179.74	14	8	8	29	651	72.7	6.06	4.14e-61	0.5355
C0RHG7	Acyl carrier protein	Acyl carrier protein OS=Brucella melitensis biotype 2 (strain ATCC 23457) OX=546272 GN=acpP PE=3 SV=1	8.02	15	1	1	2	78	8.3	4.16	0.00137875	0.613
P63450	Acyl carrier protein AcpXL	Acyl carrier protein AcpXL OS=Brucella melitensis biotype 1 (strain 16M / ATCC 23456 / NCTC 10094) OX=224914 GN=acpXL PE=3 SV=1	22.06	25	2	2	5	93	10.4	4.41	3.49e-11	0.6135
P77935	Amidophosphoribosyltransferase	Amidophosphoribosyltransferase OS=Rhizobium etli (strain CFN 42 / ATCC 51251) OX=347834 GN=purF PE=3 SV=2	17.08	4	2	2	7	496	54.1	6.39	1.05e-25	0.4535
P15395	Anthranilate synthase	Anthranilate synthase OS=Rhizobium meliloti (strain 1021) OX=266834 GN=trpE(G) PE=4 SV=1	11.47	2	1	1	1	729	80.5	5.64	0.0178404	0.672
A5VAA0	Argininosuccinate lyase	Argininosuccinate lyase OS=Sphingomonas wittichii (strain RW1 / DSM 6014 / JCM 10273) OX=392499 GN=argH PE=3 SV=1	8.5	4	1	2	7	458	49.4	5.9	7.21e-10	0.59
C0RLC0	Aspartate carbamoyltransferase	Aspartate carbamoyltransferase OS=Brucella melitensis biotype 2 (strain ATCC 23457) OX=546272 GN=pyrB PE=3 SV=1	47.15	13	4	4	19	322	34.8	7.96	6.99e-09	0.825
A9WWS1	ATP synthase epsilon chain	ATP synthase epsilon chain OS=Brucella suis (strain ATCC 23445 / NCTC 10510) OX=470137 GN=atpC PE=3 SV=1	12.61	10	1	1	3	135	14.5	5.05	0.0192912	0.78
B2S5W0	ATP-dependent Clp protease ATP-binding subunit ClpX	ATP-dependent Clp protease ATP-binding subunit ClpX OS=Brucella abortus (strain S19) OX=430066 GN=clpX PE=3 SV=1	23.73	7	3	3	12	424	46.6	5.41	5.69e-24	0.576
Q8G0I4	ATP-dependent Clp protease proteolytic subunit	ATP-dependent Clp protease proteolytic subunit OS=Brucella suis biovar 1 (strain 1330) OX=204722 GN=clpP PE=3 SV=1	56.05	9	1	1	22	209	23.4	5.86	1.92e-05	0.784
A0A0H3G586	Autotransporter adhesin BtaE	Autotransporter adhesin BtaE OS=Brucella suis biovar 1 (strain 1330) OX=204722 GN=btaE PE=1 SV=1	80.8	10	6	6	13	740	75.4	5.52	2.9e-17	0.386
Q8G1Z9	Betaine aldehyde dehydrogenase	Betaine aldehyde dehydrogenase OS=Brucella suis biovar 1 (strain 1330) OX=204722 GN=betB PE=3 SV=1	129.15	10	3	3	30	487	52.1	6.29	4.65e-21	0.69
Q8YD09？	Bifunctional imidazolonepropionase/histidine ammonia-lyase	Bifunctional imidazolonepropionase/histidine ammonia-lyase OS=Brucella melitensis biotype 1 (strain 16M / ATCC 23456 / NCTC 10094) OX=224914 GN=hutIH PE=3 SV=2	208.76	14	2	8	32	925	97.8	5.83	2.87e-16	0.557
Q7CEG6	Chaperone protein ClpB	Chaperone protein ClpB OS=Brucella suis biovar 1 (strain 1330) OX=204722 GN=clpB PE=2 SV=1	724.81	26	19	19	159	874	96.8	5.33	3.91e-71	0.7475
Q05981	Chaperone protein DnaK	Chaperone protein DnaK OS=Brucella ovis (strain ATCC 25840 / 63/290 / NCTC 10512) OX=444178 GN=dnaK PE=2 SV=2	375.3	19	4	9	188	637	68.2	4.98	2.73e-05	0.673
B8DT62	Chaperone protein DnaK	Chaperone protein DnaK OS=Bifidobacterium animalis subsp. lactis (strain AD011) OX=442563 GN=dnaK PE=3 SV=1	4.89	3	1	1	1	621	66.7	4.78	0.000153086	0.76
Q6G554	Chaperone protein DnaK	Chaperone protein DnaK OS=Bartonella henselae (strain ATCC 49882 / DSM 28221 / Houston 1) OX=283166 GN=dnaK PE=3 SV=1	149.27	10	1	5	94	630	68.2	5.06	0.000204425	0.674
Q28VY3	Chaperone protein DnaK OS=Jannaschia sp. (strain CCS1)	Chaperone protein DnaK OS=Jannaschia sp. (strain CCS1) OX=290400 GN=dnaK PE=3 SV=1	14.87	5	1	3	7	639	68.9	4.73	0.000433425	0.725
P34939	Chaperonin GroEL	Chaperonin GroEL OS=Rhizobium leguminosarum bv. viciae OX=387 GN=groEL PE=2 SV=1	157.22	12	1	5	128	546	57.8	5.21	4.94e-08	0.65
A5G1G2	Chaperonin GroEL	Chaperonin GroEL OS=Acidiphilium cryptum (strain JF-5) OX=349163 GN=groEL PE=3 SV=1	25.6	7	1	3	23	549	58.2	5.49	1.64e-06	0.664
C0RHD5	Chorismate synthase	Chorismate synthase OS=Brucella melitensis biotype 2 (strain ATCC 23457) OX=546272 GN=aroC PE=3 SV=1	19.36	4	1	1	4	364	39	7.01	1.56e-05	0.766
A5VTU2	Co-chaperonin GroES	Co-chaperonin GroES OS=Brucella ovis (strain ATCC 25840 / 63/290 / NCTC 10512) OX=444178 GN=groES PE=3 SV=1	23.46	39	3	3	5	98	10.3	6.11	1.54e-15	0.611
A9MCK4	D-amino acid dehydrogenase	D-amino acid dehydrogenase OS=Brucella canis (strain ATCC 23365 / NCTC 10854) OX=483179 GN=dadA PE=3 SV=1	182.94	28	9	9	35	416	45.1	6.92	2.91e-13	0.491
Q2YRG4	Deoxyuridine 5'-triphosphate nucleotidohydrolase	Deoxyuridine 5'-triphosphate nucleotidohydrolase OS=Brucella abortus (strain 2308) OX=359391 GN=dut PE=1 SV=1	108.56	41	5	5	23	157	16.7	7.2	1.3e-19	0.596
P20708	Dihydrolipoyllysine-residue succinyltransferase component of 2-oxoglutarate dehydrogenase complex	Dihydrolipoyllysine-residue succinyltransferase component of 2-oxoglutarate dehydrogenase complex OS=Azotobacter vinelandii OX=354 GN=sucB PE=1 SV=2	3.36	2	1	1	11	399	42	5.54	3.29e-10	0.681
Q2YPG3	Dihydroorotate dehydrogenase (quinone)	Dihydroorotate dehydrogenase (quinone) OS=Brucella abortus (strain 2308) OX=359391 GN=pyrD PE=3 SV=1	18.38	5	1	1	1	364	39.2	8.35	3.33e-08	0.789
P67479	DNA gyrase inhibitor YacG	DNA gyrase inhibitor YacG OS=Brucella melitensis biotype 1 (strain 16M / ATCC 23456 / NCTC 10094) OX=224914 GN=yacG PE=3 SV=1	4.11	16	1	1	2	57	6.4	6.48	4.39e-09	0.697
Q8FW50	DNA polymerase IV	DNA polymerase IV OS=Brucella suis biovar 1 (strain 1330) OX=204722 GN=dinB PE=3 SV=1	14.79	6	2	2	2	445	49.3	9.14	3.78e-09	0.825
B4R8K5	DNA-directed RNA polymerase subunit beta	DNA-directed RNA polymerase subunit beta OS=Phenylobacterium zucineum (strain HLK1) OX=450851 GN=rpoB PE=3 SV=1	2.92	1	1	1	1	1356	151.2	5.25	2.86e-06	0.727
B9JDS1	DNA-directed RNA polymerase subunit beta	DNA-directed RNA polymerase subunit beta OS=Agrobacterium radiobacter (strain K84 / ATCC BAA-868) OX=311403 GN=rpoB PE=3 SV=1	104.27	4	1	5	23	1380	153.5	5.11	0.0231278	0.732
Q6MDM0	DNA-directed RNA polymerase subunit beta'	DNA-directed RNA polymerase subunit beta' OS=Protochlamydia amoebophila (strain UWE25) OX=264201 GN=rpoC PE=3 SV=1	20.51	2	1	3	12	1388	155.2	7.5	1.57e-06	0.719
C0RHZ3	DNA-directed RNA polymerase subunit omega	DNA-directed RNA polymerase subunit omega OS=Brucella melitensis biotype 2 (strain ATCC 23457) OX=546272 GN=rpoZ PE=3 SV=1	34.83	17	2	2	12	133	14.5	4.32	7.02e-12	0.789
B2S7X6	Dual-specificity RNA methyltransferase RlmN	Dual-specificity RNA methyltransferase RlmN OS=Brucella abortus (strain S19) OX=430066 GN=rlmN PE=3 SV=1	18.02	4	1	1	1	411	45.8	6.57	0.000111576	0.776
Q8FWV8	Efflux pump periplasmic linker BepF	Efflux pump periplasmic linker BepF OS=Brucella suis biovar 1 (strain 1330) OX=204722 GN=bepF PE=1 SV=1	48.65	10	4	4	9	411	44	7.94	3.46e-09	0.237
Q9HZP7	Electron transfer flavoprotein subunit alpha	Electron transfer flavoprotein subunit alpha OS=Pseudomonas aeruginosa (strain ATCC 15692 / DSM 22644 / CIP 104116 / JCM 14847 / LMG 12228 / 1C / PRS 101 / PAO1) OX=208964 GN=etfA PE=3 SV=1	5.29	3	1	1	3	309	31.4	5.14	8.65e-05	0.83
Q5FTY1	Elongation factor Tu	Elongation factor Tu OS=Gluconobacter oxydans (strain 621H) OX=290633 GN=tuf PE=3 SV=1	115.9	17	1	4	54	396	43	5.3	1.73e-10	0.724
A7HBL7	Elongation factor Tu	Elongation factor Tu OS=Anaeromyxobacter sp. (strain Fw109-5) OX=404589 GN=tuf1 PE=3 SV=1	35.71	11	1	2	4	396	43.4	5.74	9.19e-07	0.647
Q2G8Y2	Elongation factor Tu	Elongation factor Tu OS=Novosphingobium aromaticivorans (strain ATCC 700278 / DSM 12444 / CCUG 56034 / CIP 105152 / NBRC 16084 / F199) OX=279238 GN=tuf PE=3 SV=1	113.94	11	1	3	84	396	43	5.19	0.000233609	0.777
Q2YIQ4	Erythritol catabolism regulatory protein EryD	Erythritol catabolism regulatory protein EryD OS=Brucella abortus (strain 2308) OX=359391 GN=eryD PE=2 SV=1	8.98	7	2	2	3	316	33.6	5.64	0.00284585	0.3655
Q8YB50	Fumarate hydratase class II	Fumarate hydratase class II OS=Brucella melitensis biotype 1 (strain 16M / ATCC 23456 / NCTC 10094) OX=224914 GN=fumC PE=3 SV=2	101.59	13	4	4	23	463	49.6	6.14	8.99e-25	0.597
Q52812	General L-amino acid-binding periplasmic protein AapJ	General L-amino acid-binding periplasmic protein AapJ OS=Rhizobium leguminosarum bv. viciae (strain 3841) OX=216596 GN=aapJ PE=1 SV=1	6.84	3	1	1	1	341	36.7	5.3	1.77e-13	0.071
Q8FV09	Glucokinase	Glucokinase OS=Brucella suis biovar 1 (strain 1330) OX=204722 GN=glk PE=3 SV=1	127.56	17	1	5	34	343	37	5.55	1.37e-18	0.145
Q39FF4	Glucose-6-phosphate isomerase	Glucose-6-phosphate isomerase OS=Burkholderia lata (strain ATCC 17760 / DSM 23089 / LMG 22485 / NCIMB 9086 / R18194 / 383) OX=482957 GN=pgi PE=3 SV=2	3.18	4	1	1	1	540	59.3	6.49	5.76e-06	0.685
B0CGZ3	Glutamate racemase	Glutamate racemase OS=Brucella suis (strain ATCC 23445 / NCTC 10510) OX=470137 GN=murI PE=3 SV=1	37.26	16	3	3	6	277	30.7	7.37	4.06e-10	0.676
Q92Z29	Glycerol-3-phosphate acyltransferase	Copper-containing nitrite reductase OS=Rhizobium meliloti (strain 1021) OX=266834 GN=nirK PE=3 SV=1	12.89	3	1	1	3	376	40.2	6.13	5.49e-09	0.641
A9WYS0	Glycerol-3-phosphate acyltransferase	Glycerol-3-phosphate acyltransferase OS=Brucella suis (strain ATCC 23445 / NCTC 10510) OX=470137 GN=plsY PE=3 SV=1	14.81	7	1	1	1	201	20.5	10.62	5.87e-09	0.827
A9WVU3	Histidine ammonia-lyase	Histidine ammonia-lyase OS=Brucella suis (strain ATCC 23445 / NCTC 10510) OX=470137 GN=hutH PE=3 SV=1	179.84	22	1	7	29	511	53.2	6.42	3.68e-07	0.692
Q8FXF9	HTH-type quorum sensing-dependent transcriptional regulator VjbR	HTH-type quorum sensing-dependent transcriptional regulator VjbR OS=Brucella suis biovar 1 (strain 1330) OX=204722 GN=vjbR PE=3 SV=1	83.93	28	5	5	27	259	28.6	6.77	8.12e-07	0.487
Q8G020	Hydrogenobyrinate a,c-diamide synthase	Hydrogenobyrinate a,c-diamide synthase OS=Brucella suis biovar 1 (strain 1330) OX=204722 GN=cobB PE=3 SV=1	146.61	29	10	10	46	436	46.9	7.05	4.83e-16	0.8125
A6WXE0	Hydroxyacylglutathione hydrolase	Hydroxyacylglutathione hydrolase OS=Brucella anthropi (strain ATCC 49188 / DSM 6882 / CCUG 24695 / JCM 21032 / LMG 3331 / NBRC 15819 / NCTC 12168 / Alc 37) OX=439375 GN=gloB PE=3 SV=1	31.96	10	2	2	5	260	28.6	6.18	5.5e-15	0.7455
B0CGT9	Indole-3-glycerol phosphate synthase	Indole-3-glycerol phosphate synthase OS=Brucella suis (strain ATCC 23445 / NCTC 10510) OX=470137 GN=trpC PE=3 SV=1	96.66	19	4	4	22	268	29.2	5.62	0.00412473	0.811
O68965	Inositol 2-dehydrogenase	Inositol 2-dehydrogenase OS=Rhizobium meliloti (strain 1021) OX=266834 GN=idhA PE=1 SV=2	5.66	3	1	1	1	330	35.1	5.6	5.42e-07	0.787
Q92M71	Inositol-1-monophosphatase	Inositol-1-monophosphatase OS=Rhizobium meliloti (strain 1021) OX=266834 GN=suhB PE=3 SV=1	4.77	3	1	1	1	266	28.7	7.2	2.64e-11	0.699
Q2YP18	Integration host factor subunit beta	Integration host factor subunit beta OS=Brucella abortus (strain 2308) OX=359391 GN=ihfB PE=3 SV=1	8.14	11	1	1	18	94	10.6	9.98	2.61e-12	0.662
Q2YPK5	Invasion protein B homolog BAB1_0368	Invasion protein B homolog BAB1_0368 OS=Brucella abortus (strain 2308) OX=359391 GN=BAB1_0368 PE=3 SV=1	12.77	16	3	3	17	173	18	8.73	7.88e-17	0.766
Q8YGH4	K(+)-insensitive pyrophosphate-energized proton pump	K(+)-insensitive pyrophosphate-energized proton pump OS=Brucella melitensis biotype 1 (strain 16M / ATCC 23456 / NCTC 10094) OX=224914 GN=hppA PE=3 SV=2	28.82	5	4	4	12	718	73.3	5.62	1.82e-14	0.7435
Q8FYS9	Leu/Ile/Val-binding protein homolog 2	Leu/Ile/Val-binding protein homolog 2 OS=Brucella suis biovar 1 (strain 1330) OX=204722 GN=BR1782 PE=3 SV=1	61	9	2	2	9	371	39.5	5.3	2.65e-19	0.462
Q8YDV4	Leu/Ile/Val-binding protein homolog 4	Leu/Ile/Val-binding protein homolog 4 OS=Brucella melitensis biotype 1 (strain 16M / ATCC 23456 / NCTC 10094) OX=224914 GN=BMEII0070 PE=3 SV=2	52.15	11	3	3	15	416	44.3	6.34	0.0149447	0.714
Q8FUM7	Leu/Ile/Val-binding protein homolog 5	Leu/Ile/Val-binding protein homolog 5 OS=Brucella suis biovar 1 (strain 1330) OX=204722 GN=BRA1193 PE=3 SV=1	207.83	15	4	4	62	406	44.2	5.9	3.15e-23	0.7095
Q8YC99	Leu/Ile/Val-binding protein homolog 6	Leu/Ile/Val-binding protein homolog 6 OS=Brucella melitensis biotype 1 (strain 16M / ATCC 23456 / NCTC 10094) OX=224914 GN=BMEII0633 PE=3 SV=2	91.17	16	5	5	12	390	41.6	5.96	4.61e-19	0.54
Q57AX1	Malate dehydrogenase	Malate dehydrogenase OS=Brucella abortus biovar 1 (strain 9-941) OX=262698 GN=mdh PE=3 SV=1	86.08	17	3	3	46	320	33.7	5.43	1.31e-20	0.7345
P52559	N5-carboxyaminoimidazole ribonucleotide synthase	N5-carboxyaminoimidazole ribonucleotide synthase OS=Brucella melitensis biotype 1 (strain 16M / ATCC 23456 / NCTC 10094) OX=224914 GN=purK PE=3 SV=2	67.21	16	4	4	15	362	38.7	5.59	7e-11	0.581
Q2YNE1	N-acetyl-gamma-glutamyl-phosphate reductase	N-acetyl-gamma-glutamyl-phosphate reductase OS=Brucella abortus (strain 2308) OX=359391 GN=argC PE=3 SV=1	112.3	24	7	7	15	310	33.8	6.33	3.54e-29	0.779
P29913	NADH-quinone oxidoreductase chain 1	NADH-quinone oxidoreductase chain 1 OS=Paracoccus denitrificans OX=266 GN=nqo1 PE=1 SV=1	13.56	3	1	1	3	431	47.2	6.54	2.44e-09	0.751
O68852	NADH-quinone oxidoreductase subunit A 1	NADH-quinone oxidoreductase subunit A 1 OS=Rhizobium meliloti (strain 1021) OX=266834 GN=nuoA1 PE=3 SV=1	7.05	12	1	1	1	121	13.8	4.72	0.0241621	0.795
Q8G1B5	NADH-quinone oxidoreductase subunit C	NADH-quinone oxidoreductase subunit C OS=Brucella suis biovar 1 (strain 1330) OX=204722 GN=nuoC PE=3 SV=1	144.72	40	7	7	40	202	23.3	4.74	4.31e-25	0.679
A8F0M0	NADH-quinone oxidoreductase subunit F	NADH-quinone oxidoreductase subunit F OS=Rickettsia massiliae (strain Mtu5) OX=416276 GN=nuoF PE=3 SV=1	2.52	2	1	1	2	421	46.2	7.84	3.47e-09	0.774
Q8G1A9	NADH-quinone oxidoreductase subunit I	NADH-quinone oxidoreductase subunit I OS=Brucella suis biovar 1 (strain 1330) OX=204722 GN=nuoI PE=3 SV=1	12.68	17	2	2	4	163	18.5	7.58	0.000265261	0.781
P23883	NADP/NAD-dependent aldehyde dehydrogenase PuuC	NADP/NAD-dependent aldehyde dehydrogenase PuuC OS=Escherichia coli (strain K12) OX=83333 GN=puuC PE=1 SV=2	11.13	2	1	1	13	495	53.4	6.06	1.37e-08	0.684
B2S630	NADPH-dependent 7-cyano-7-deazaguanine reductase	NADPH-dependent 7-cyano-7-deazaguanine reductase OS=Brucella abortus (strain S19) OX=430066 GN=queF PE=3 SV=1	8.73	12	1	1	1	155	17.4	5.8	0.000123144	0.59
Q8G0Y6	Outer membrane efflux protein Bep	Outer membrane efflux protein BepC OS=Brucella suis biovar 1 (strain 1330) OX=204722 GN=bepC PE=1 SV=1	56.59	9	3	3	9	456	48.5	9.14	2.09e-18	0.724
Q51676	Oxygen-independent coproporphyrinogen III oxidase	Oxygen-independent coproporphyrinogen III oxidase OS=Paracoccus denitrificans (strain Pd 1222) OX=318586 GN=hemN PE=3 SV=1	5.44	2	1	1	2	451	49.8	6.38	8.27e-05	0.803
P63920	Peptide deformylase-like	Peptide deformylase-like OS=Brucella suis biovar 1 (strain 1330) OX=204722 GN=def PE=3 SV=1	19.84	13	2	2	4	164	18.8	7.03	4.71e-11	0.8125
P65447	Peptide methionine sulfoxide reductase MsrB	Peptide methionine sulfoxide reductase MsrB OS=Brucella melitensis biotype 1 (strain 16M / ATCC 23456 / NCTC 10094) OX=224914 GN=msrB PE=3 SV=1	12.94	10	1	1	3	146	16.3	5.35	2.28e-06	0.749
A6X1X9	Phosphate acyltransferase	Phosphate acyltransferase OS=Brucella anthropi (strain ATCC 49188 / DSM 6882 / CCUG 24695 / JCM 21032 / LMG 3331 / NBRC 15819 / NCTC 12168 / Alc 37) OX=439375 GN=plsX PE=3 SV=1	10.84	4	1	1	2	352	37.4	7.17	1.42e-05	0.811
Q52989	Phosphate-specific transport system accessory protein PhoU homolog	Phosphate-specific transport system accessory protein PhoU homolog OS=Rhizobium meliloti (strain 1021) OX=266834 GN=phoU PE=3 SV=2	4.35	5	1	1	3	237	26.2	5.3	1.64e-07	0.734
Q029J4	Probable cytosol aminopeptidase	Probable cytosol aminopeptidase OS=Solibacter usitatus (strain Ellin6076) OX=234267 GN=pepA PE=3 SV=1	10.86	3	1	1	1	480	50.8	6.18	0.0423195	0.832
Q8FWR0	Probable phosphoketolase	Probable phosphoketolase OS=Brucella suis biovar 1 (strain 1330) OX=204722 GN=xfp PE=3 SV=1	209.85	15	10	10	42	789	89.2	6.23	2.82e-58	0.608
A6WZX3	Probable potassium transport system protein kup	Probable potassium transport system protein kup OS=Brucella anthropi (strain ATCC 49188 / DSM 6882 / CCUG 24695 / JCM 21032 / LMG 3331 / NBRC 15819 / NCTC 12168 / Alc 37) OX=439375 GN=kup PE=3 SV=1	6.85	2	1	1	1	651	70.6	9.17	0.000156676	0.801
P55653	Probable succinate-semialdehyde dehydrogenase [NADP(+)]	Probable succinate-semialdehyde dehydrogenase [NADP(+)] OS=Sinorhizobium fredii (strain NBRC 101917 / NGR234) OX=394 GN=gabD PE=3 SV=1	6.75	2	1	1	4	491	53.2	6.64	3.89e-07	0.519
Q1CZW4	Probable transaldolase	Probable transaldolase OS=Myxococcus xanthus (strain DK1622) OX=246197 GN=tal PE=3 SV=1	9.81	5	1	1	15	223	24.1	6.54	1.54e-15	0.05
A5I1C9	Probable transaldolase	Probable transaldolase OS=Clostridium botulinum (strain Hall / ATCC 3502 / NCTC 13319 / Type A) OX=441771 GN=tal PE=3 SV=1	5.37	4	1	1	5	217	23.8	5.49	3.14e-10	0.502
Q98NQ6	Protein RecA	Protein RecA OS=Mesorhizobium japonicum (strain LMG 29417 / CECT 9101 / MAFF 303099) OX=266835 GN=recA PE=3 SV=1	43.95	13	3	3	8	365	39	5.26	2.99e-09	0.8155
P0A4R0	Protein-methionine-sulfoxide reductase catalytic subunit MsrP	Protein-methionine-sulfoxide reductase catalytic subunit MsrP OS=Brucella melitensis biotype 1 (strain 16M / ATCC 23456 / NCTC 10094) OX=224914 GN=msrP PE=3 SV=1	37.11	10	2	2	11	319	35.4	8.44	2.45e-10	0.7645
Q2YK66	Putative ABC transporter peptide-binding protein BAB2_0812	Putative ABC transporter peptide-binding protein BAB2_0812 OS=Brucella abortus (strain 2308) OX=359391 GN=BAB2_0812 PE=3 SV=1	28.47	2	1	1	12	527	57.3	6.46	0.000479385	0.606
Q8YI11	Putative fluoride ion transporter CrcB 2	Putative fluoride ion transporter CrcB 2 OS=Brucella melitensis biotype 1 (strain 16M / ATCC 23456 / NCTC 10094) OX=224914 GN=crcB2 PE=3 SV=1	66.56	19	4	4	27	270	28.3	7.12	3.4e-12	0.395
Q8YDG6	Putative peptide-binding periplasmic protein	Putative peptide-binding periplasmic protein BMEII0210 OS=Brucella melitensis biotype 1 (strain 16M / ATCC 23456 / NCTC 10094) OX=224914 GN=BMEII0210 PE=3 SV=2	8.63	2	1	1	2	514	57.2	5.5	1.64e-13	0.164
B0CIJ4	Putative pterin-4-alpha-carbinolamine dehydratase	Putative pterin-4-alpha-carbinolamine dehydratase OS=Brucella suis (strain ATCC 23445 / NCTC 10510) OX=470137 GN=BSUIS_A0085 PE=3 SV=1	19.53	11	1	1	4	97	11	6.8	4.52e-27	0.356
A6WX71	Putative pyruvate, phosphate dikinase regulatory protein	Putative pyruvate, phosphate dikinase regulatory protein OS=Brucella anthropi (strain ATCC 49188 / DSM 6882 / CCUG 24695 / JCM 21032 / LMG 3331 / NBRC 15819 / NCTC 12168 / Alc 37) OX=439375 GN=Oant_0853 PE=3 SV=1	29.75	12	3	3	8	276	30.3	6.65	9.02e-17	0.808
Q2YMD1	Pyridoxine/pyridoxamine 5'-phosphate oxidase	Pyridoxine/pyridoxamine 5'-phosphate oxidase OS=Brucella abortus (strain 2308) OX=359391 GN=pdxH PE=3 SV=1	15.89	19	2	2	2	208	23.9	8.09	0.00830178	0.805
Q2YIF7	Response regulator receiver protein CpdR	Response regulator receiver protein CpdR OS=Brucella abortus (strain 2308) OX=359391 GN=cpdR PE=1 SV=1	7.39	9	1	1	1	120	13.6	5.05	0.00857209	0.82
Q2YN92	Riboflavin synthase	Riboflavin synthase OS=Brucella abortus (strain 2308) OX=359391 GN=ribE PE=1 SV=1	49.13	16	3	3	24	202	22.2	5.11	6.91e-28	0.345
Q8YJ71	RNA pyrophosphohydrolase	RNA pyrophosphohydrolase OS=Brucella melitensis biotype 1 (strain 16M / ATCC 23456 / NCTC 10094) OX=224914 GN=rppH PE=3 SV=1	12.53	16	3	3	7	178	19.8	5.11	3.11e-19	0.595
B2S5W3	RNA-binding protein Hfq	RNA-binding protein Hfq OS=Brucella abortus (strain S19) OX=430066 GN=hfq PE=3 SV=1	65.53	42	2	2	22	78	8.8	8.21	3.4e-10	0.583
A8IFY6	Shikimate dehydrogenase (NADP(+))	Shikimate dehydrogenase (NADP(+)) OS=Azorhizobium caulinodans (strain ATCC 43989 / DSM 5975 / JCM 20966 / LMG 6465 / NBRC 14845 / NCIMB 13405 / ORS 571) OX=438753 GN=aroE PE=3 SV=1	15.38	5	1	1	6	281	29.6	6.74	0.00671567	0.761
Q8FW10	sn-glycerol-3-phosphate-binding periplasmic protein UgpB	sn-glycerol-3-phosphate-binding periplasmic protein UgpB OS=Brucella suis biovar 1 (strain 1330) OX=204722 GN=ugpB PE=3 SV=1	39.89	5	2	2	11	433	47.1	5.52	9.4e-15	0.771
C0RFH1	Succinate--CoA ligase [ADP-forming] subunit beta	Succinate--CoA ligase [ADP-forming] subunit beta OS=Brucella melitensis biotype 2 (strain ATCC 23457) OX=546272 GN=sucC PE=3 SV=1	73.57	16	2	5	57	398	42.5	5.01	2.77e-17	0.7645
Q89X60	Succinate--CoA ligase [ADP-forming] subunit beta	Succinate--CoA ligase [ADP-forming] subunit beta OS=Bradyrhizobium diazoefficiens (strain JCM 10833 / BCRC 13528 / IAM 13628 / NBRC 14792 / USDA 110) OX=224911 GN=sucC PE=3 SV=1	14.02	5	1	2	14	398	41.9	5.96	4.03e-13	0.633
A6WXE8	Succinate--CoA ligase [ADP-forming] subunit beta	Succinate--CoA ligase [ADP-forming] subunit beta OS=Brucella anthropi (strain ATCC 49188 / DSM 6882 / CCUG 24695 / JCM 21032 / LMG 3331 / NBRC 15819 / NCTC 12168 / Alc 37) OX=439375 GN=sucC PE=3 SV=1	102.54	15	1	4	36	398	42.5	5.01	9.42e-05	0.691
P02906	Sulfate-binding protein	Sulfate-binding protein OS=Salmonella typhimurium (strain LT2 / SGSC1412 / ATCC 700720) OX=99287 GN=sbp PE=1 SV=3	6.92	5	1	1	8	329	36.5	7.61	9.84e-07	0.63
Q578I2	Sulfur carrier protein FdhD	Sulfur carrier protein FdhD OS=Brucella abortus biovar 1 (strain 9-941) OX=262698 GN=fdhD PE=3 SV=1	56.81	14	3	3	5	269	28.9	5.47	3.33e-12	0.66
P66827	Superoxide dismutase [Cu-Zn]	Superoxide dismutase [Cu-Zn] OS=Brucella suis biovar 1 (strain 1330) OX=204722 GN=sodC PE=3 SV=1	188.52	41	4	4	19	174	18.3	6.74	9.85e-06	0.804
P00275	Thioredoxin C-1	Thioredoxin C-1 OS=Corynebacterium nephridii OX=1722 PE=1 SV=1	29.42	15	1	1	8	105	11.3	4.67	6.25e-12	0.591
P41031	Thiosulfate-binding protein	Thiosulfate-binding protein OS=Salmonella typhimurium (strain LT2 / SGSC1412 / ATCC 700720) OX=99287 GN=cysP PE=3 SV=2	5.38	3	1	1	3	338	37.6	8.78	0.00748082	0.458
B0CGE4	Thymidylate kinase	Thymidylate kinase OS=Brucella suis (strain ATCC 23445 / NCTC 10510) OX=470137 GN=tmk PE=3 SV=1	9.19	10	2	2	2	214	23.1	5.49	0.0213921	0.781
Q989F0	Translation initiation factor IF-1	Translation initiation factor IF-1 OS=Mesorhizobium japonicum (strain LMG 29417 / CECT 9101 / MAFF 303099) OX=266835 GN=infA PE=3 SV=1	41.4	19	1	1	3	72	8.4	9.52	4.2e-09	0.362
A5VSP1	tRNA (guanine-N(1)-)-methyltransferase	tRNA (guanine-N(1)-)-methyltransferase OS=Brucella ovis (strain ATCC 25840 / 63/290 / NCTC 10512) OX=444178 GN=trmD PE=3 SV=1	24.98	10	2	2	7	241	26.5	5.55	1.87e-09	0.408
A5VSL6	tRNA N6-adenosine threonylcarbamoyltransferase	tRNA N6-adenosine threonylcarbamoyltransferase OS=Brucella ovis (strain ATCC 25840 / 63/290 / NCTC 10512) OX=444178 GN=tsaD PE=3 SV=1	24.51	11	3	3	4	359	37.9	5.59	0.0112787	0.814
Q8FXY6	Tryptophan synthase alpha chain	Tryptophan synthase alpha chain OS=Brucella suis biovar 1 (strain 1330) OX=204722 GN=trpA PE=3 SV=1	6.16	4	1	1	2	279	29.4	5.72	0.000727015	0.819
P0C531	Type IV secretion system protein virB10	Type IV secretion system protein virB10 OS=Brucella abortus biovar 1 (strain 9-941) OX=262698 GN=virB10 PE=3 SV=1	63.44	15	4	4	6	388	41.2	7.05	1.11e-13	0.275
Q8FXK7	Type IV secretion system protein VirB11	Type IV secretion system protein VirB11 OS=Brucella suis biovar 1 (strain 1330) OX=204722 GN=virB11 PE=1 SV=1	89.57	12	4	4	24	361	40.7	6.54	6.18e-27	0.1975
Q9RPY2	Type IV secretion system protein virB3	Type IV secretion system protein virB3 OS=Brucella melitensis biotype 1 (strain 16M / ATCC 23456 / NCTC 10094) OX=224914 GN=virB3 PE=3 SV=1	10.18	9	1	1	2	116	13.1	11.4	1.73e-12	0.185
Q9RPY1	Type IV secretion system protein virB4	Type IV secretion system protein virB4 OS=Brucella suis biovar 1 (strain 1330) OX=204722 GN=virB4 PE=2 SV=2	142.92	11	9	9	47	831	94.5	6.67	2.66e-39	0.137
Q2YJ78	Type IV secretion system protein virB8	Type IV secretion system protein virB8 OS=Brucella abortus (strain 2308) OX=359391 GN=virB8 PE=3 SV=1	49.17	17	4	4	30	239	26.4	8.66	3.05e-41	0.1625
Q9RPX6	Type IV secretion system protein virB9	Type IV secretion system protein virB9 OS=Brucella suis biovar 1 (strain 1330) OX=204722 GN=virB9 PE=2 SV=1	104.46	22	4	4	24	289	31.9	9.55	1.96e-06	0.445
Q8YDY8	Type IV secretion system putative outer membrane lipoprotein BMEII0036	Type IV secretion system putative outer membrane lipoprotein BMEII0036 OS=Brucella melitensis biotype 1 (strain 16M / ATCC 23456 / NCTC 10094) OX=224914 GN=BMEII0036 PE=3 SV=1	41.39	19	3	3	14	172	19	10.26	5.98e-14	0.145
A9M5G6	UDP-3-O-acylglucosamine N-acyltransferase	UDP-3-O-acylglucosamine N-acyltransferase OS=Brucella canis (strain ATCC 23365 / NCTC 10854) OX=483179 GN=lpxD PE=3 SV=1	78.69	20	4	4	19	351	36.3	6.43	0.00105695	0.828
Q8FZP4	UDP-N-acetylenolpyruvoylglucosamine reductase	UDP-N-acetylenolpyruvoylglucosamine reductase OS=Brucella suis biovar 1 (strain 1330) OX=204722 GN=murB PE=3 SV=1	34.67	7	2	2	5	322	34.9	6.3	0.000338873	0.8075
A5VUS8	UPF0173 metal-dependent hydrolase BOV_A0561	UPF0173 metal-dependent hydrolase BOV_A0561 OS=Brucella ovis (strain ATCC 25840 / 63/290 / NCTC 10512) OX=444178 GN=BOV_A0561 PE=3 SV=1	98.63	12	1	2	38	237	25.1	6.02	2.47e-15	0.521
A9M966	UPF0178 protein BCAN_A2024	UPF0178 protein BCAN_A2024 OS=Brucella canis (strain ATCC 23365 / NCTC 10854) OX=483179 GN=BCAN_A2024 PE=3 SV=1	4.98	8	1	1	1	161	17.1	6.54	0.000857318	0.749
A9MB47	UPF0283 membrane protein BCAN_A1047	UPF0283 membrane protein BCAN_A1047 OS=Brucella canis (strain ATCC 23365 / NCTC 10854) OX=483179 GN=BCAN_A1047 PE=3 SV=1	7.76	3	1	1	2	357	38.9	9.42	2.34e-05	0.592
Q2YJ11	UPF0309 protein BAB2_0325	UPF0309 protein BAB2_0325 OS=Brucella abortus (strain 2308) OX=359391 GN=BAB2_0325 PE=3 SV=1	3.9	4	1	1	3	242	25.6	6.06	2.44e-09	0.722
A9M7P7	UPF0335 protein BCAN_A1790	UPF0335 protein BCAN_A1790 OS=Brucella canis (strain ATCC 23365 / NCTC 10854) OX=483179 GN=BCAN_A1790 PE=3 SV=1	44.54	21	1	1	21	86	10	4.88	7.12e-10	0.74
Q2YL59	UPF0434 protein BAB2_0345	UPF0434 protein BAB2_0345 OS=Brucella abortus (strain 2308) OX=359391 GN=BAB2_0345 PE=3 SV=1	31.01	33	2	2	18	64	7.1	5.06	6.38e-14	0.593
Q8G2P7	Urease accessory protein UreE 1	Urease accessory protein UreE 1 OS=Brucella suis biovar 1 (strain 1330) OX=204722 GN=ureE1 PE=1 SV=1	85.82	27	3	3	10	162	18.5	6.43	0.00344293	0.817
A9M617	Urease accessory protein UreG 2	Urease accessory protein UreG 2 OS=Brucella canis (strain ATCC 23365 / NCTC 10854) OX=483179 GN=ureG2 PE=3 SV=1	9.3	6	1	1	1	212	23	5.11	5.35e-06	0.524
Q2YPD7	Urease subunit gamma 1	Urease subunit gamma 1 OS=Brucella abortus (strain 2308) OX=359391 GN=ureA1 PE=1 SV=1	30.69	27	2	2	5	100	11.1	6.3	0.0191786	0.8255
C0RM77	Urocanate hydratase	Urocanate hydratase OS=Brucella melitensis biotype 2 (strain ATCC 23457) OX=546272 GN=hutU PE=3 SV=1	70.24	11	6	6	35	557	61.2	6.58	3.32e-59	0.603
A9M9H3	Xylose isomerase	Xylose isomerase OS=Brucella canis (strain ATCC 23365 / NCTC 10854) OX=483179 GN=xylA PE=3 SV=1	102.93	14	5	5	15	435	49	5.55	4.99e-12	0.7785

## Sheet: vaccine strain
Data S5. Highly expressed proteins in vaccine strain
Accession	Protein	Description	Score Sequest HT: Sequest HT	Coverage [%]	# Unique Peptides	# Peptides	# PSMs	# AAs	MW [kDa]	calc. pI	p_value	1_2
Q2YIQ1	Erythritol kinase	Erythritol kinase OS=Brucella abortus (strain 2308) OX=359391 GN=eryA PE=1 SV=2	641.37	30	13	13	73	520	54.6	5.64	3.32e-64	3.3915
Q57DR3	Phosphoribosylaminoimidazole-succinocarboxamide synthase	Phosphoribosylaminoimidazole-succinocarboxamide synthase OS=Brucella abortus biovar 1 (strain 9-941) OX=262698 GN=purC PE=3 SV=1	162.1	31	7	7	55	254	28.9	5.94	1.55e-41	1.474
B2S6R2	Ribosomal RNA small subunit methyltransferase H	Ribosomal RNA small subunit methyltransferase H OS=Brucella abortus (strain S19) OX=430066 GN=rsmH PE=3 SV=1	113.97	21	7	7	23	346	37.5	8.88	2.16e-37	1.3965
P46368	Acetaldehyde dehydrogenase 2	Acetaldehyde dehydrogenase 2 OS=Cupriavidus necator (strain ATCC 17699 / DSM 428 / KCTC 22496 / NCIMB 10442 / H16 / Stanier 337) OX=381666 GN=acoD PE=1 SV=1	30.65	6	3	3	28	506	54.8	5.99	1.4e-30	5.937
C0RJK4	Elongation factor G	Elongation factor G OS=Brucella melitensis biotype 2 (strain ATCC 23457) OX=546272 GN=fusA PE=3 SV=1	348.69	16	9	9	72	694	76.2	5.16	5.88e-26	1.484
Q8FZ13	Phosphoglucosamine mutase	Phosphoglucosamine mutase OS=Brucella suis biovar 1 (strain 1330) OX=204722 GN=glmM PE=3 SV=1	60.77	10	4	4	16	451	48.5	6.29	3.77e-25	1.5935
B0CLQ0	Anhydro-N-acetylmuramic acid kinase	Anhydro-N-acetylmuramic acid kinase OS=Brucella suis (strain ATCC 23445 / NCTC 10510) OX=470137 GN=anmK PE=3 SV=1	75.75	13	4	4	7	373	39.8	6.24	3.36e-21	1.266
Q8YHC4	UvrABC system protein A	UvrABC system protein A OS=Brucella melitensis biotype 1 (strain 16M / ATCC 23456 / NCTC 10094) OX=224914 GN=uvrA PE=3 SV=1	131.17	14	12	12	26	974	107.4	6.61	3.63e-21	1.275
P0A3T3	31 kDa immunogenic protein	31 kDa immunogenic protein OS=Brucella abortus biovar 1 (strain 9-941) OX=262698 GN=bcsP31 PE=4 SV=1	266.55	17	5	5	89	329	34.3	7.52	7.06e-21	2.289
Q57B08	Porphobilinogen deaminase	Porphobilinogen deaminase OS=Brucella abortus biovar 1 (strain 9-941) OX=262698 GN=hemC PE=3 SV=1	164.34	30	8	8	48	314	33.8	6.13	8.26e-21	1.2235
Q2YIQ2	D-erythritol 1-phosphate dehydrogenase	D-erythritol 1-phosphate dehydrogenase OS=Brucella abortus (strain 2308) OX=359391 GN=eryB PE=1 SV=1	389.64	32	14	14	85	502	56.2	7.01	2.13e-19	2.814
Q9R9N5	Pyruvate dehydrogenase E1 component subunit alpha	Pyruvate dehydrogenase E1 component subunit alpha OS=Rhizobium meliloti (strain 1021) OX=266834 GN=pdhA PE=3 SV=1	43.63	9	3	3	37	348	38.1	7.58	1.38e-17	1.293
Q2YIQ3	D-erythrulose 1-phosphate 3-epimerase	D-erythrulose 1-phosphate 3-epimerase OS=Brucella abortus (strain 2308) OX=359391 GN=eryC PE=1 SV=1	145.87	22	5	5	36	310	35	5.47	1.07e-14	4.662
P61711	6,7-dimethyl-8-ribityllumazine synthase 2	6,7-dimethyl-8-ribityllumazine synthase 2 OS=Brucella abortus biovar 1 (strain 9-941) OX=262698 GN=ribH2 PE=3 SV=1	85.38	27	3	3	28	158	17.3	7.12	1.2e-14	1.7315
P50351	Transcriptional regulatory protein ChvI	Transcriptional regulatory protein ChvI OS=Sinorhizobium fredii (strain NBRC 101917 / NGR234) OX=394 GN=chvI PE=3 SV=2	20.03	14	3	3	13	241	27.1	6	4.13e-14	1.404
Q8YHN5	50S ribosomal protein L22	50S ribosomal protein L22 OS=Brucella melitensis biotype 1 (strain 16M / ATCC 23456 / NCTC 10094) OX=224914 GN=rplV PE=3 SV=1	32.41	16	2	2	19	129	14.1	10.56	1.04e-13	1.3155
A5VRM1	Carbamoyl-phosphate synthase small chain	Carbamoyl-phosphate synthase small chain OS=Brucella ovis (strain ATCC 25840 / 63/290 / NCTC 10512) OX=444178 GN=carA PE=3 SV=1	20.33	5	2	2	12	407	43.5	5.92	3.03e-13	1.2425
Q8FXW6	Glutathione synthetase	Glutathione synthetase OS=Brucella suis biovar 1 (strain 1330) OX=204722 GN=gshb PE=3 SV=1	77.32	12	3	3	28	312	35.3	5.73	4.21e-13	1.4085
A9M9Z6	tRNA pseudouridine synthase B	tRNA pseudouridine synthase B OS=Brucella canis (strain ATCC 23365 / NCTC 10854) OX=483179 GN=truB PE=3 SV=1	5.9	3	1	1	2	324	35.6	5.22	5.74e-13	1.448
P56902	3-oxoacyl-[acyl-carrier-protein] synthase 2	3-oxoacyl-[acyl-carrier-protein] synthase 2 OS=Rhizobium meliloti (strain 1021) OX=266834 GN=fabF PE=3 SV=2	5.44	2	1	1	4	421	44.2	5.72	8.42e-13	1.984
Q8YFI5	Na(+)/H(+) antiporter NhaA	Na(+)/H(+) antiporter NhaA OS=Brucella melitensis biotype 1 (strain 16M / ATCC 23456 / NCTC 10094) OX=224914 GN=nhaA PE=3 SV=2	59.21	7	4	4	15	736	78.5	8.92	2.36e-12	1.621
Q8FYR4	ATP synthase gamma chain	ATP synthase gamma chain OS=Brucella suis biovar 1 (strain 1330) OX=204722 GN=atpG PE=3 SV=1	66.41	14	4	4	24	292	31.8	7.9	5.91e-12	1.837
P9WH74	Ribonucleoside-diphosphate reductase subunit alpha	Ribonucleoside-diphosphate reductase subunit alpha OS=Mycobacterium tuberculosis (strain CDC 1551 / Oshkosh) OX=83331 GN=nrdE PE=3 SV=1	6.05	1	1	1	1	725	82.4	6.43	7e-12	2.02
Q8G1R0	4-hydroxy-tetrahydrodipicolinate synthase	4-hydroxy-tetrahydrodipicolinate synthase OS=Brucella suis biovar 1 (strain 1330) OX=204722 GN=dapA PE=1 SV=1	128.16	14	3	3	43	293	31.6	6.73	9.1e-12	1.501
P45675	Nitrogen regulation protein NtrY homolog	Nitrogen regulation protein NtrY homolog OS=Azospirillum brasilense OX=192 PE=3 SV=2	9.97	1	1	1	3	777	84.3	8.12	1.07e-11	1.4865
Q8FVW4	Alkyl hydroperoxide reductase AhpD	Alkyl hydroperoxide reductase AhpD OS=Brucella suis biovar 1 (strain 1330) OX=204722 GN=ahpD PE=3 SV=1	130.84	22	3	3	44	175	18.8	7.24	3.01e-11	1.764
Q2YLZ2	UDP-3-O-acyl-N-acetylglucosamine deacetylase	UDP-3-O-acyl-N-acetylglucosamine deacetylase OS=Brucella abortus (strain 2308) OX=359391 GN=lpxC PE=3 SV=1	126.48	21	4	4	18	286	30.8	5.1	3.03e-11	1.7305
A6WX40	Adenosylhomocysteinase	Adenosylhomocysteinase OS=Brucella anthropi (strain ATCC 49188 / DSM 6882 / CCUG 24695 / JCM 21032 / LMG 3331 / NBRC 15819 / NCTC 12168 / Alc 37) OX=439375 GN=ahcY PE=3 SV=1	147.95	17	1	7	38	466	50.7	5.33	3.45e-11	1.68
Q8U526	DNA translocase FtsK	DNA translocase FtsK OS=Agrobacterium fabrum (strain C58 / ATCC 33970) OX=176299 GN=ftsK PE=3 SV=3	7.52	1	1	1	2	891	96.8	5.3	3.69e-11	2.737
Q9K974	DNA repair protein RecN	DNA repair protein RecN OS=Alkalihalobacillus halodurans (strain ATCC BAA-125 / DSM 18197 / FERM 7344 / JCM 9153 / C-125) OX=272558 GN=recN PE=3 SV=1	4.42	2	1	1	1	565	63.7	5.33	4.04e-11	1.567
Q8RH57	Tyrosine--tRNA ligase	Tyrosine--tRNA ligase OS=Fusobacterium nucleatum subsp. nucleatum (strain ATCC 25586 / DSM 15643 / BCRC 10681 / CIP 101130 / JCM 8532 / KCTC 2640 / LMG 13131 / VPI 4355) OX=190304 GN=tyrS PE=3 SV=1	5.37	2	1	1	7	406	46.6	6.42	5.42e-11	1.247
P41027	Signal peptidase I	Signal peptidase I OS=Bacillus caldolyticus OX=1394 GN=lepB PE=3 SV=1	2.78	4	1	1	5	182	21.2	9.82	5.59e-11	1.523
P59078	Methionine--tRNA ligase	Methionine--tRNA ligase OS=Brucella suis biovar 1 (strain 1330) OX=204722 GN=metG PE=1 SV=1	246.37	21	8	8	51	515	58	5.44	7.54e-11	1.337
Q9ZB26	D-erythrulose-4-phosphate isomerase	D-erythrulose-4-phosphate isomerase OS=Brucella abortus (strain 2308) OX=359391 GN=eryI PE=1 SV=2	184.36	42	6	6	52	151	15.7	5.3	7.67e-11	1.203
P0A3L0	Translation initiation factor IF-3	Translation initiation factor IF-3 OS=Brucella abortus biovar 1 (strain 9-941) OX=262698 GN=infC PE=3 SV=1	4.95	5	1	1	2	178	20.4	9.39	7.81e-11	1.593
Q9PA21	Transcription termination factor Rho	Transcription termination factor Rho OS=Xylella fastidiosa (strain 9a5c) OX=160492 GN=rho PE=3 SV=1	48.2	6	1	2	29	411	46.1	8.12	1.89e-10	1.237
Q8UEM4	Vitamin B12-dependent ribonucleotide reductase	Vitamin B12-dependent ribonucleotide reductase OS=Agrobacterium fabrum (strain C58 / ATCC 33970) OX=176299 GN=nrdJ PE=3 SV=1	41.65	2	3	3	20	1272	139.5	5.97	2.69e-10	1.958
P0A3B4	Large ribosomal subunit assembly factor BipA	50S ribosomal subunit assembly factor BipA OS=Shigella flexneri OX=623 GN=bipA PE=3 SV=1	38.22	3	1	1	3	607	67.3	5.33	2.83e-10	1.761
Q6FZC6	Small ribosomal subunit protein uS19	30S ribosomal protein S19 OS=Bartonella quintana (strain Toulouse) OX=283165 GN=rpsS PE=3 SV=1	2.75	9	1	1	5	92	10.4	10.33	3.67e-10	1.317
P65452	UDP-N-acetylglucosamine 1-carboxyvinyltransferase	UDP-N-acetylglucosamine 1-carboxyvinyltransferase OS=Brucella melitensis biotype 1 (strain 16M / ATCC 23456 / NCTC 10094) OX=224914 GN=murA PE=3 SV=1	141.33	17	6	6	33	429	45.7	7.06	7.11e-10	1.347
Q051U4	ATP-dependent dethiobiotin synthetase BioD	ATP-dependent dethiobiotin synthetase BioD OS=Leptospira borgpetersenii serovar Hardjo-bovis (strain L550) OX=355276 GN=bioD PE=3 SV=1	3.26	4	1	1	5	221	24.7	6.8	8.54e-10	1.247
A6U877	Large ribosomal subunit protein uL30	50S ribosomal protein L30 OS=Sinorhizobium medicae (strain WSM419) OX=366394 GN=rpmD PE=3 SV=1	16.26	18	1	1	2	67	7.5	11.28	1.03e-09	1.638
Q5LX29	Small ribosomal subunit protein bS21	30S ribosomal protein S21 OS=Ruegeria pomeroyi (strain ATCC 700808 / DSM 15171 / DSS-3) OX=246200 GN=rpsU PE=3 SV=1	4.51	13	1	1	1	68	8.1	11.05	1.03e-09	4.414
Q57DW2	Small ribosomal subunit protein uS9	30S ribosomal protein S9 OS=Brucella abortus biovar 1 (strain 9-941) OX=262698 GN=rpsI PE=3 SV=1	56.18	21	1	2	14	158	17.2	10.35	1.13e-09	2.136
O31314	Cell division protein FtsZ	Cell division protein FtsZ OS=Bartonella bacilliformis OX=774 GN=ftsZ PE=3 SV=2	39.74	6	3	3	9	592	63.5	5.07	1.62e-09	1.306
Q2YQS9	Lyso-ornithine lipid O-acyltransferase	Lyso-ornithine lipid O-acyltransferase OS=Brucella abortus (strain 2308) OX=359391 GN=olsA PE=1 SV=1	6.4	4	1	1	3	267	29.6	10.52	1.67e-09	1.508
Q7NIV3	Probable dual-specificity RNA methyltransferase RlmN	Probable dual-specificity RNA methyltransferase RlmN OS=Gloeobacter violaceus (strain ATCC 29082 / PCC 7421) OX=251221 GN=rlmN PE=3 SV=1	2.75	3	1	1	1	348	38.5	8.28	2.75e-09	3.045
Q2YR68	Aquaporin Z	Aquaporin Z OS=Brucella abortus (strain 2308) OX=359391 GN=aqpZ PE=3 SV=1	6.33	4	1	1	5	228	23.1	7.34	3.85e-09	4.644
Q8YJI8	7-cyano-7-deazaguanine synthase	7-cyano-7-deazaguanine synthase OS=Brucella melitensis biotype 1 (strain 16M / ATCC 23456 / NCTC 10094) OX=224914 GN=queC PE=3 SV=1	14.53	5	1	1	7	232	25.2	6.6	4.14e-09	1.683
Q3SWP9	Translation initiation factor IF-2	Translation initiation factor IF-2 OS=Nitrobacter winogradskyi (strain ATCC 25391 / DSM 10237 / CIP 104748 / NCIMB 11846 / Nb-255) OX=323098 GN=infB PE=3 SV=1	2.6	1	1	1	2	871	93.6	9.01	1.3e-08	1.455
A5VSE4	ATP synthase subunit delta	ATP synthase subunit delta OS=Brucella ovis (strain ATCC 25840 / 63/290 / NCTC 10512) OX=444178 GN=atpH PE=3 SV=1	75.32	19	4	4	23	186	19.6	8.44	1.77e-08	1.3485
Q57180	Uncharacterized ABC transporter ATP-binding protein HI_1051	Uncharacterized ABC transporter ATP-binding protein HI_1051 OS=Haemophilus influenzae (strain ATCC 51907 / DSM 11121 / KW20 / Rd) OX=71421 GN=HI_1051 PE=3 SV=1	2.56	1	1	1	1	614	68.4	9.09	2.05e-08	1.812
Q8FZ45	Ferric uptake regulation protein	Ferric uptake regulation protein OS=Brucella suis biovar 1 (strain 1330) OX=204722 GN=fur PE=3 SV=1	18.62	11	1	1	1	141	16.4	6.61	4.56e-08	1.594
P80194	DNA polymerase I, thermostable	DNA polymerase I, thermostable OS=Thermus caldophilus OX=272 GN=polA PE=1 SV=2	6.98	2	1	1	1	834	93.7	6.52	4.68e-08	1.468
Q2YR05	7-methyl-GTP pyrophosphatase	7-methyl-GTP pyrophosphatase OS=Brucella abortus (strain 2308) OX=359391 GN=BAB1_2069 PE=3 SV=1	37.64	13	2	2	3	199	21.5	5.85	5.15e-08	1.2235
A5VQK8	Putative membrane protein insertion efficiency factor	Putative membrane protein insertion efficiency factor OS=Brucella ovis (strain ATCC 25840 / 63/290 / NCTC 10512) OX=444178 GN=BOV_1039 PE=3 SV=1	3.52	7	1	1	2	123	14	10.14	5.59e-08	1.78
B2SBF6	Homoserine O-acetyltransferase	Homoserine O-acetyltransferase OS=Brucella abortus (strain S19) OX=430066 GN=metAA PE=3 SV=1	49.1	11	3	3	10	306	35.2	6.28	5.61e-08	1.297
A9WXS2	DNA mismatch repair protein MutL	DNA mismatch repair protein MutL OS=Brucella suis (strain ATCC 23445 / NCTC 10510) OX=470137 GN=mutL PE=3 SV=1	274.61	23	11	11	37	623	66.8	6.7	6.61e-08	1.369
Q8UJ37	Cytochrome c homolog	Cytochrome c homolog OS=Agrobacterium fabrum (strain C58 / ATCC 33970) OX=176299 GN=cycM PE=3 SV=1	3.22	4	1	1	10	192	19.7	6.27	7.99e-08	1.667
B2SB67	Blue-light-activated histidine kinase	Blue-light-activated histidine kinase OS=Brucella abortus (strain S19) OX=430066 GN=BAbS19_II06090 PE=3 SV=1	46.85	9	4	4	8	489	54.9	7.42	9.96e-08	1.638
Q98H64	Homospermidine synthase	Homospermidine synthase OS=Mesorhizobium japonicum (strain LMG 29417 / CECT 9101 / MAFF 303099) OX=266835 GN=hss PE=3 SV=1	2.88	2	1	1	3	485	54.2	6.8	1.47e-07	1.36
A9IYX0	ATP synthase subunit alpha	ATP synthase subunit alpha OS=Bartonella tribocorum (strain CIP 105476 / IBS 506) OX=382640 GN=atpA PE=3 SV=1	38.88	6	1	2	11	511	55.6	6.34	4.04e-07	1.249
Q8YI24	Pyridoxine 5'-phosphate synthase	Pyridoxine 5'-phosphate synthase OS=Brucella melitensis biotype 1 (strain 16M / ATCC 23456 / NCTC 10094) OX=224914 GN=pdxJ PE=3 SV=1	101.44	23	4	4	25	246	26.5	5.63	6.04e-07	1.212
Q8YH68	NAD(P)H dehydrogenase (quinone)	NAD(P)H dehydrogenase (quinone) OS=Brucella melitensis biotype 1 (strain 16M / ATCC 23456 / NCTC 10094) OX=224914 GN=BMEI0936 PE=3 SV=1	93.79	19	3	3	9	199	21.4	6.39	6.22e-07	3.9315
B2SAB9	Porin Omp2a	Porin Omp2a OS=Brucella abortus (strain S19) OX=430066 GN=omp2a PE=1 SV=1	58.91	14	1	3	12	321	34.5	4.75	7.07e-07	1.284
Q579H8	Methionine import ATP-binding protein MetN	Methionine import ATP-binding protein MetN OS=Brucella abortus biovar 1 (strain 9-941) OX=262698 GN=metN PE=3 SV=2	19.28	6	2	2	2	369	39.4	9.09	7.4e-07	1.201
Q9ZCZ7	Transcription termination/antitermination protein	Transcription termination/antitermination protein NusA OS=Rickettsia prowazekii (strain Madrid E) OX=272947 GN=nusA PE=3 SV=1	2.33	2	1	1	5	503	56.8	5.15	8.17e-07	1.297
Q986B5	Glycine--tRNA ligase beta subunit	Glycine--tRNA ligase beta subunit OS=Mesorhizobium japonicum (strain LMG 29417 / CECT 9101 / MAFF 303099) OX=266835 GN=glyS PE=3 SV=1	9.54	3	1	1	2	718	78.6	5.55	8.2e-07	1.263
C0RKP1	Protein NrdI	Protein NrdI OS=Brucella melitensis biotype 2 (strain ATCC 23457) OX=546272 GN=nrdI PE=3 SV=1	2.89	9	1	1	1	135	14.6	9.41	8.64e-07	1.436
Q57A81	Small ribosomal subunit protein bS20	30S ribosomal protein S20 OS=Brucella abortus biovar 1 (strain 9-941) OX=262698 GN=rpsT PE=3 SV=1	2.01	9	1	1	1	88	9.7	11.63	9.47e-07	1.432
A5V287	Nucleoside diphosphate kinase	Nucleoside diphosphate kinase OS=Sphingomonas wittichii (strain RW1 / DSM 6014 / JCM 10273) OX=392499 GN=ndk PE=3 SV=1	95.23	12	1	1	31	140	15.3	5.58	9.74e-07	1.386
B2S9N0	ATP synthase subunit b 1	ATP synthase subunit b 1 OS=Brucella abortus (strain S19) OX=430066 GN=atpF1 PE=3 SV=1	35.98	18	3	3	17	208	21.9	5.19	2.11e-06	1.217
Q211V0	DNA ligase	DNA ligase OS=Rhodopseudomonas palustris (strain BisB18) OX=316056 GN=ligA PE=3 SV=1	3.6	1	1	1	1	795	87	6.29	2.63e-06	1.322
P22729	High-affinity branched-chain amino acid transport system permease protein LivM	High-affinity branched-chain amino acid transport system permease protein LivM OS=Escherichia coli (strain K12) OX=83333 GN=livM PE=3 SV=2	17.97	3	1	1	2	425	46.2	9.64	3.32e-06	3.851
A9M8C0	Uncharacterized protein BCAN_A0346	Uncharacterized protein BCAN_A0346 OS=Brucella canis (strain ATCC 23365 / NCTC 10854) OX=483179 GN=BCAN_A0346 PE=3 SV=1	3.53	3	1	1	1	342	36.9	5.97	3.99e-06	2.421
A5VNW2	ATP synthase subunit a	ATP synthase subunit a OS=Brucella ovis (strain ATCC 25840 / 63/290 / NCTC 10512) OX=444178 GN=atpB PE=3 SV=1	19.28	5	1	1	3	249	27	8.7	4.5e-06	1.304
Q8FY29	Ribosomal RNA small subunit methyltransferase G	Ribosomal RNA small subunit methyltransferase G OS=Brucella suis biovar 1 (strain 1330) OX=204722 GN=rsmG PE=3 SV=1	23.32	12	2	2	7	213	23.5	7.46	5.36e-06	1.395
P51039	Citrate synthase	Citrate synthase (Fragment) OS=Rickettsia australis OX=787 GN=gltA PE=3 SV=2	39.5	4	1	1	6	411	46.1	6.74	5.58e-06	1.381
Q8YEB3	Translation initiation factor IF-2	Translation initiation factor IF-2 OS=Brucella melitensis biotype 1 (strain 16M / ATCC 23456 / NCTC 10094) OX=224914 GN=infB PE=3 SV=2	313.84	13	9	9	53	959	104.1	8.97	7.63e-06	1.313
Q9ZLD9	DNA gyrase subunit A	DNA gyrase subunit A OS=Helicobacter pylori (strain J99 / ATCC 700824) OX=85963 GN=gyrA PE=3 SV=1	3	1	1	1	2	828	92.6	6.21	9.35e-06	1.205
Q3SSY3	Large ribosomal subunit protein uL1	50S ribosomal protein L1 OS=Nitrobacter winogradskyi (strain ATCC 25391 / DSM 10237 / CIP 104748 / NCIMB 11846 / Nb-255) OX=323098 GN=rplA PE=3 SV=1	14.14	6	1	1	5	230	23.8	9.83	1.26e-05	1.29
B2S536	Large ribosomal subunit protein uL13	50S ribosomal protein L13 OS=Brucella abortus (strain S19) OX=430066 GN=rplM PE=3 SV=1	58.94	29	3	3	13	154	17.3	10.18	1.46e-05	1.219
P0AFY7	Peptide antibiotic transporter SbmA	Peptide antibiotic transporter SbmA OS=Escherichia coli O157:H7 OX=83334 GN=sbmA PE=3 SV=1	2.79	2	1	1	1	406	46.4	8.47	1.91e-05	1.251
Q7CNT2	Urease subunit beta 1	Urease subunit beta 1 OS=Brucella melitensis biotype 1 (strain 16M / ATCC 23456 / NCTC 10094) OX=224914 GN=ureB1 PE=3 SV=1	7.68	18	2	2	2	101	11.3	6.8	2.94e-05	1.306
P75088	Ribosome-binding ATPase YchF	Ribosome-binding ATPase YchF OS=Mycoplasma pneumoniae (strain ATCC 29342 / M129) OX=272634 GN=ychF PE=3 SV=1	19.39	4	1	1	5	362	40.6	6.99	3.61e-05	1.637
C0RFV3	roporphyrinogen decarboxylase	Uroporphyrinogen decarboxylase OS=Brucella melitensis biotype 2 (strain ATCC 23457) OX=546272 GN=hemE PE=3 SV=1	188.51	18	5	5	32	341	37.8	5.02	4.94e-05	1.212
P0CB37	Glucokinase	Glucokinase OS=Brucella abortus biovar 1 (strain 9-941) OX=262698 GN=glk PE=3 SV=1	128.91	17	1	5	39	343	37.1	5.55	9.85e-05	4.101
A9M8R8	iaminopimelate epimerase	Diaminopimelate epimerase OS=Brucella canis (strain ATCC 23365 / NCTC 10854) OX=483179 GN=dapF PE=3 SV=1	77.92	23	5	5	11	303	32.3	5.19	0.000221482	1.378
B2S9A5	Tryptophan synthase beta chain	Tryptophan synthase beta chain OS=Brucella abortus (strain S19) OX=430066 GN=trpB PE=3 SV=1	85.07	22	7	7	19	406	43.5	6.29	0.000275801	1.232
Q6FZB7	Small ribosomal subunit protein uS12	30S ribosomal protein S12 OS=Bartonella quintana (strain Toulouse) OX=283165 GN=rpsL PE=3 SV=1	5.25	7	1	1	1	123	13.9	11.62	0.000277055	1.557
Q8FUN4	Putative binding protein BRA1186/BS1330_II1177	Putative binding protein BRA1186/BS1330_II1177 OS=Brucella suis biovar 1 (strain 1330) OX=204722 GN=BRA1186 PE=3 SV=1	21.83	8	2	2	7	319	34.4	5.85	0.000434824	2.053
A5VVV1	Methylglyoxal synthase	Methylglyoxal synthase OS=Brucella ovis (strain ATCC 25840 / 63/290 / NCTC 10512) OX=444178 GN=mgsA PE=3 SV=1	72.05	30	2	2	20	125	13.5	6.52	0.000454893	1.572
P65361	Cell division topological specificity factor	Cell division topological specificity factor OS=Brucella melitensis biotype 1 (strain 16M / ATCC 23456 / NCTC 10094) OX=224914 GN=minE PE=3 SV=1	14.08	20	2	2	9	90	10.1	9.6	0.000601211	4.2605
Q8FX16	Nitrous-oxide reductase	Nitrous-oxide reductase OS=Brucella suis biovar 1 (strain 1330) OX=204722 GN=nosZ PE=3 SV=1	157.03	16	8	8	36	639	71	5.8	0.000798381	1.336
Q2YM98	GTPase Der	GTPase Der OS=Brucella abortus (strain 2308) OX=359391 GN=der PE=3 SV=1	151.77	27	11	11	24	483	53.3	7.06	0.00289126	1.2435
Q6G1L7	Diaminopimelate epimerase	Diaminopimelate epimerase OS=Bartonella henselae (strain ATCC 49882 / DSM 28221 / Houston 1) OX=283166 GN=dapF PE=3 SV=1	4.54	5	1	1	1	283	31.2	5.82	0.00407011	1.379
C0RIK0	Nicotinate-nucleotide--dimethylbenzimidazole phosphoribosyltransferase	Nicotinate-nucleotide--dimethylbenzimidazole phosphoribosyltransferase OS=Brucella melitensis biotype 2 (strain ATCC 23457) OX=546272 GN=cobT PE=3 SV=1	87.36	15	4	4	18	339	35.1	5.5	0.00432298	1.334
Q2YIQ6	L-erythrulose-1-phosphate isomerase	L-erythrulose-1-phosphate isomerase OS=Brucella abortus (strain 2308) OX=359391 GN=eryH PE=1 SV=1	106.38	19	4	4	26	256	27.9	5.26	0.00576557	1.5035
P0DOA0	Sensor kinase CckA	Sensor kinase CckA OS=Brucella abortus (strain 2308) OX=359391 GN=cckA PE=1 SV=1	130.6	10	6	6	30	945	103.1	5.95	0.00936666	1.437
Q9RTN7	Aconitate hydratase A	Aconitate hydratase A OS=Deinococcus radiodurans (strain ATCC 13939 / DSM 20539 / JCM 16871 / LMG 4051 / NBRC 15346 / NCIMB 9279 / R1 / VKM B-1422) OX=243230 GN=acn PE=1 SV=1	2.96	1	1	1	1	906	97.9	5.07	0.0220946	1.266
Q8G2M8	HTH-type transcriptional repressor BepR	HTH-type transcriptional repressor BepR OS=Brucella suis biovar 1 (strain 1330) OX=204722 GN=bepR PE=1 SV=1	25.13	11	2	2	5	209	23.5	5.43	0.0408982	1.682
Q8G044	D-alanine--D-alanine ligase A	D-alanine--D-alanine ligase A OS=Brucella suis biovar 1 (strain 1330) OX=204722 GN=ddlA PE=3 SV=1	66.82	17	5	5	11	353	37.5	5.06	0.0454808	1.307
